# Supplementary material for: Structural and morphological aspects of (fluoro)quinolone delivery by layered double hydroxide nanoparticles
Source: Royal Society of Chemistry journal article supplement (doi:10.1039/c8nj03072c), 2018-01-01
Supplement: c8nj03072c1.pdf [file c8nj03072c1.pdf]

**Supplementary Information**

**Structural and morphological aspects of (fluor)quinolones delivery by layered double hydroxide nanoparticles.**

Yadira Salguero<sup>1</sup>, Mónica Cristina García<sup>2</sup>, Giuliana Mosconi<sup>3</sup>, Ricardo Rojas<sup>1\*</sup>

<sup>1</sup> INFIQC-CONICET, Departamento de Fisicoquímica,

<sup>2</sup> UNITEFA-CONICET, Departamento de Ciencias Farmacéuticas.

<sup>3</sup> IPQA-CONICET, Departamento de Química Orgánica,

Facultad de Ciencias Químicas, Universidad Nacional de Córdoba. Ciudad Universitaria,  
X5000HUA, Córdoba, Argentina.

\*Corresponding author.

E-mail addresses: rrojas@fcq.unc.edu.ar, mgarcia@fcq.unc.edu.ar,  
yadisalgueros@gmail.com, mosconigiuliana@gmail.com.

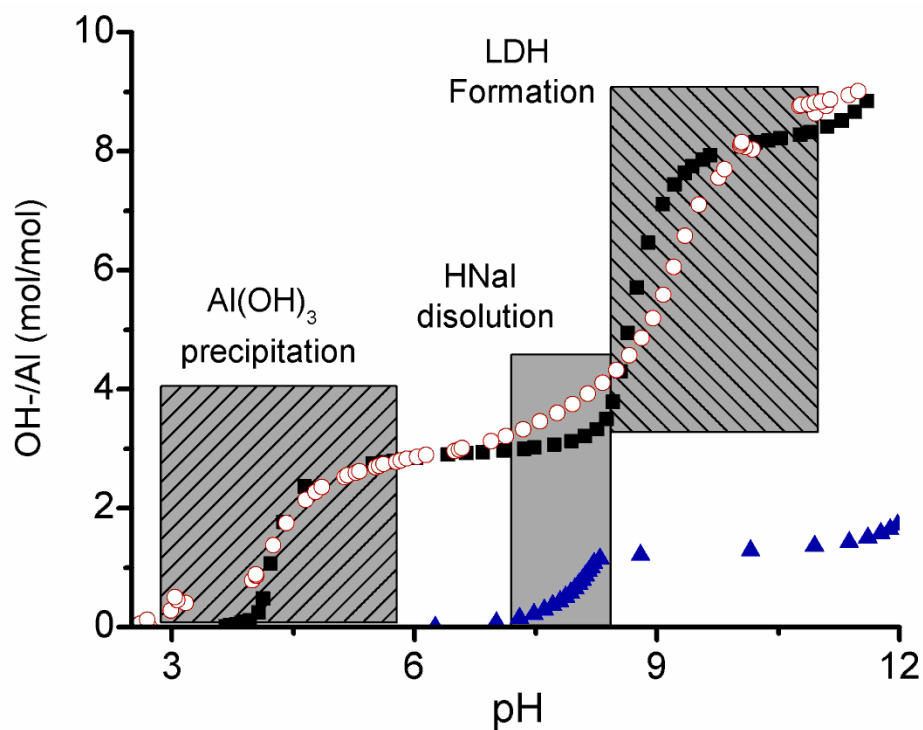

**Figure S1.** Titration curves of  $\text{MgCl}_2+\text{AlCl}_3$  (3:1 molar ratio) (filled squares)  $\text{MgCl}_2+\text{AlCl}_3+\text{HNal}$  (3:1:1) and pure HNal as a reference. The marked zones indicate the reactions produced in each pH range.

### SI.1. Reactions involved in the synthesis of LDH-Nal-DSs.

In order to study the reactions involved in the synthesis of the LDH-Nal-DSs and the dependence of their composition with the synthesis conditions,  $\text{MgCl}_2$   $0.3 \text{ mol L}^{-1}$  and  $\text{AlCl}_3$   $0.1 \text{ mol L}^{-1}$  solutions (100 mL) with and without the presence of HNal (0.01 mol) were titrated with a  $1 \text{ mol L}^{-1}$  NaOH solution (Figure S1). A HNal dispersion was also titrated as a reference. A Titrand 905 automatic titrator (Metrohm) controlled by Tiamo software and coupled to a Metrohm 9.0262.100 combined pH electrode and a Dosino 800 dosing unit was used in these experiments. The titrant volumes were adjusted to achieve regular pH gaps, while equilibrium was considered reached at a  $2 \text{ mV/min}$  electrode drift.

The titration curve of the metal salts without HNaI showed two OH<sup>-</sup> consumption steps. The first one, placed between pH 3.5 and 5, corresponded to the formation of Al(OH)<sub>3</sub>, which present a lower solubility than Mg(OH)<sub>2</sub>[1]:

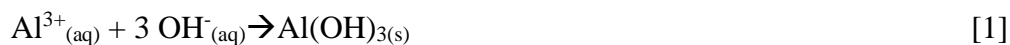

Accordingly, the plateau was obtained for a OH/Al ratio of 3 approximately. The second step, produced at pH=8-9.5, was assigned to the formation of the chloride intercalated 3:1 Mg-Al-LDH:

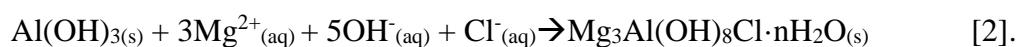

Then, the overall reaction was:

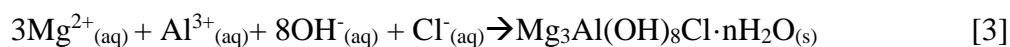

The titration curve in the presence of HNaI exhibited these two steps but also a step assigned to the deprotonation of nalidixic acid. Nevertheless, an important aspect of the formation of the LDH-Nal conjugates was related to the interactions of NaI<sup>-</sup> with Mg<sup>2+</sup> and Al<sup>3+</sup> ions [2,3]. First, the titration curves begin at a lower pH, which indicated that a portion of NaI<sup>-</sup> ions deprotonated to interact with the metal ions concurrent in the media. Also, once the Al(OH)<sub>3</sub>(s) formation and HNaI dissolution begins, the generated NaI<sup>-</sup> anions were expected to interact with Mg<sup>2+</sup> ions to precipitate Mg(NaI)<sub>2</sub>·4H<sub>2</sub>O complex:

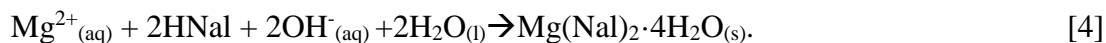

This is the reaction competing with NaI-intercalated LDH formation in the synthesis of LDH-Nal-DSs. In the case of the titration experiment the LDH layers are formed as pH increases, according to the reaction

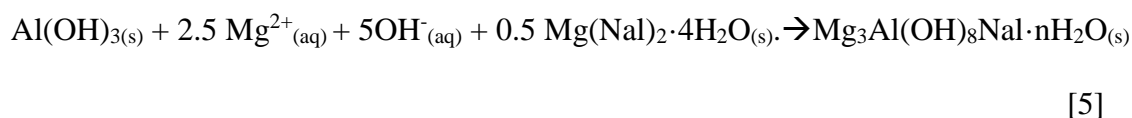

The overall reaction for this titration can then be written as

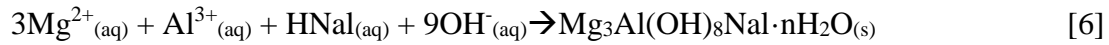

This reaction was consistent with the plateau reached at a OH/Al ratio around 8.8. Note that, if  $\text{Mg}(\text{Nal})_2 \cdot 4\text{H}_2\text{O}_{(\text{s})}$  had not dissolved, the theoretical OH/Al value would be lower, according to the following reaction.

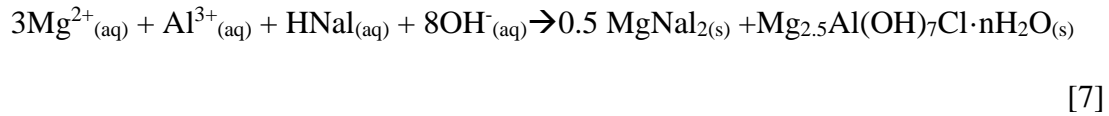

Then, the reactions involved in the synthesis of LDH by coprecipitation at constant or variable pH would be those represented in eq. [4] and [6]. The preference for one or another and, consequently, the phases obtained would be determined by the synthesis conditions, specially  $[\text{OH}]^{-}$  during the synthesis. Conditions where a large excess of  $\text{OH}^{-}$  anions were maintained (low supersaturation, variable pH  $\rightarrow$  LDH-Nal-pHvar) favored reaction [6], while those where  $\text{OH}^{-}$  is just enough to produce LDH precipitation (low supersaturation, constant pH, LDH-Nal-pHcte) produced competition between reactions [4] and [6].

## SI.2. Nal affinity for LDH layers and effect of $\text{Mg}(\text{Nal})_2$ on LDH-Nal-DSs.

To complete the study of the interaction of Nal anions with the LDH layers and its effect on the properties of the obtained LDH-Nal conjugates,  $1.00 \text{ g L}^{-1}$  LDH-Cl dispersions with increasing Nal concentration ( $[\text{Nal}]$  ranging from  $0.07$  to  $5.9 \text{ mmol L}^{-1}$ ) were equilibrated overnight.  $[\text{Nal}]$  in the supernatants was measured by UV-Vis spectrophotometry at  $\lambda=330 \text{ nm}$  to determine Nal uptake ( $\Gamma$ ) by LDH-Cl. Also, the hydrodynamic diameter ( $d$ ) and zeta potential ( $\zeta$ ) of the particles was determined and portion of the solids obtained were dried to obtain their PXRD patterns.

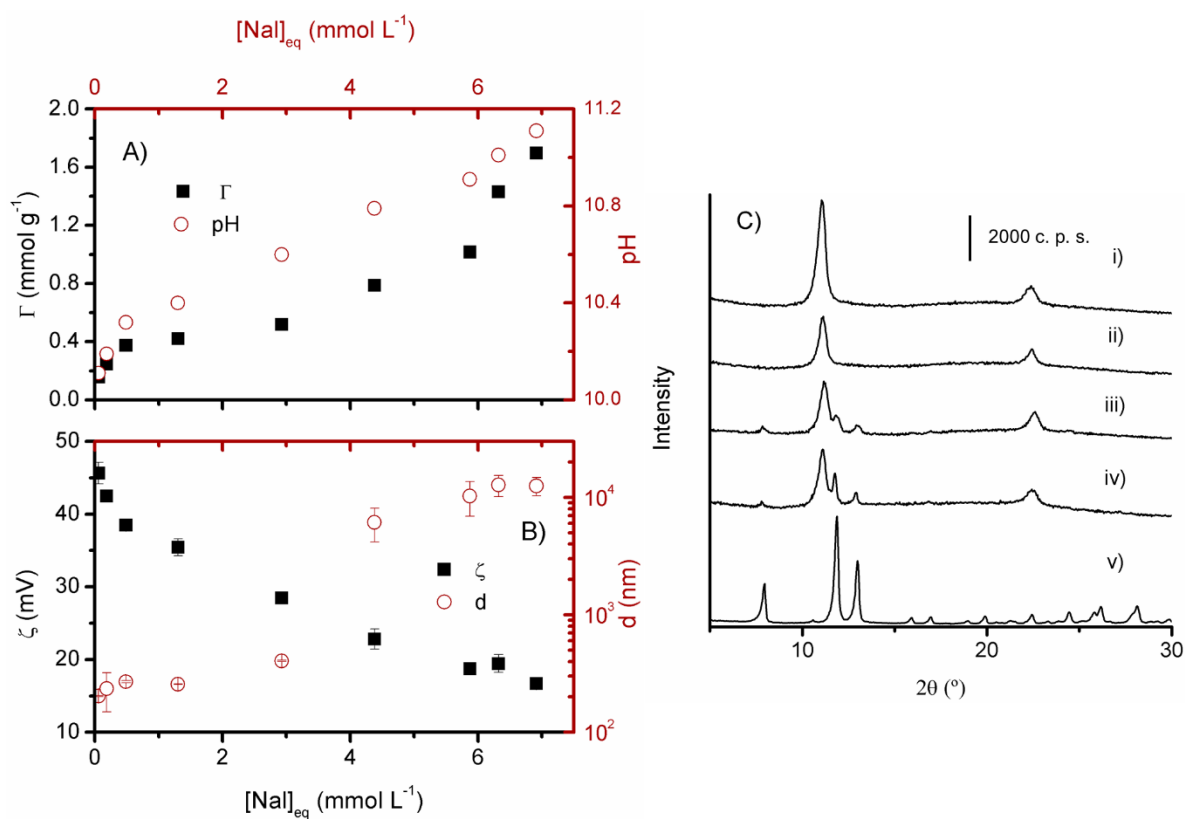

**Figure S2.** NaI uptake ( $\Gamma$ ), pH,  $\zeta$  and  $d$  vs. [NaI] curves (A and B) in 1 g L<sup>-1</sup> LDH-Cl dispersions with increasing initial [NaI]. C) PXRD patterns of the solids obtained at 0.1 g L<sup>-1</sup> (i), 0.4 g L<sup>-1</sup> (ii), 1.2 g L<sup>-1</sup> (iii), 1.8 g L<sup>-1</sup> (iv); as well as a that of Mg(NaI)<sub>2</sub> (v).

The sorption isotherm showed two stages: at low [NaI], there is a first uptake that reached a plateau at around  $\Gamma=0.4$  mmol g<sup>-1</sup>, corresponding to 15 % of the anion exchange capacity (AEC) of LDH-Cl. This stage was associated with adsorption of NaI anions. In this stage, a  $\zeta$  decrease was produced, which indicated that NaI anions possessed higher affinity for LDH surface than chloride anions. Nevertheless, the  $\zeta$  diminution did not produce a charge reversal, which indicated that nalidixate only held electrostatic interactions with the LDH surface [4]. As a consequence of the small  $\zeta$  diminution, the LDH-Cl particles did not aggregate and, consequently, maintained their small particle size. A second stage that did not reach a plateau value in the [NaI] range of the experiments was developed at [NaI]<sub>eq</sub>>2.5 mmol L<sup>-1</sup>. This stage was associated with the partial dissolution of the Mg<sup>2+</sup> ions from LDH layers and the formation of a salt with NaI<sup>-</sup> ions:

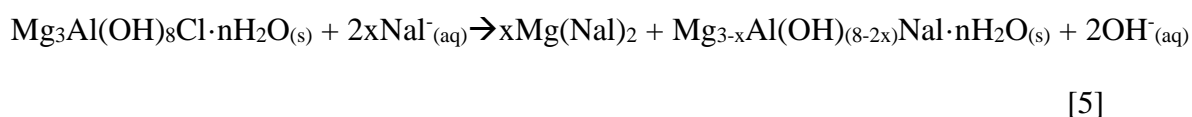

Quite accordingly, the PXRD patterns of the solids obtained in this stage showed peaks of Mg(NaI)<sub>2</sub> reference sample. Also, the pH increase in this stage was concordant with the reaction proposed in Eq. [5]. This process led to a  $\zeta$  decrease and a  $d$  increase, which was consistent with the larger size and negative zeta potential of Mg(NaI)<sub>2</sub> (see main text). These results underline the equilibrium existing between the LDH phases and Mg(NaI)<sub>2</sub> complex, which can be displaced by changes in [NaI].

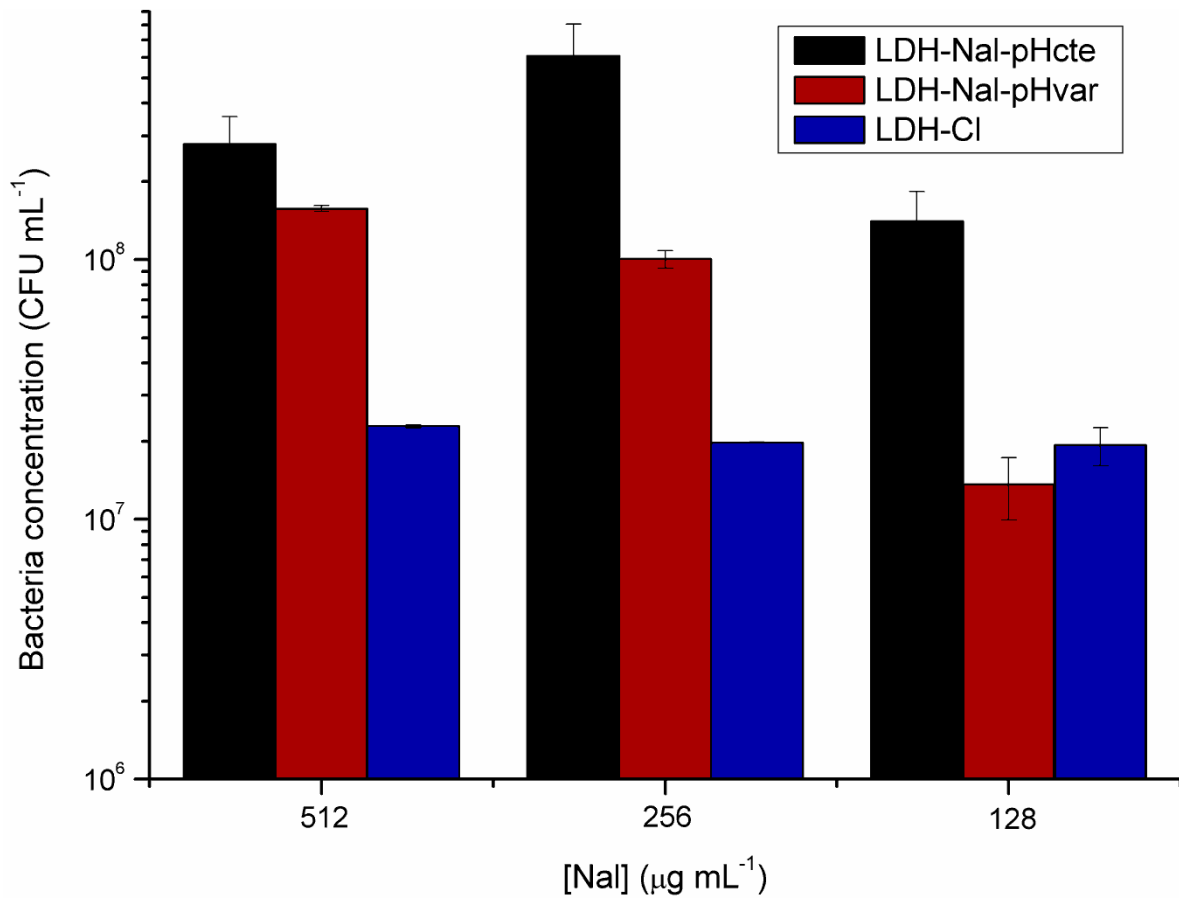

**Figure S3.** Bacteria count of lawn cultures on Mueller Hinton agar seeded with Mueller-Hinton broth ( $10^5$ CFU mL<sup>-1</sup>) that contained [Nal] above the MIC of the samples.

## References

- [1] J.W. Bocclair, P.S. Braterman, Layered double hydroxide stability. 1. Relative stabilities of layered double hydroxides and their simple counterparts, *Chem. Mater.* 11 (1999) 298–302. doi:10.1021/cm980523u.
- [2] B.L. Lomaestro, G.R. Bailie, Drug interactions interactions: A review, *Drugs.* 25 (2001) 411–416.
- [3] I. Turel, The interactions of metal ions with quinolone antibacterial agents, *Coord. Chem. Rev.* 232 (2002) 27–47. doi:10.1016/S0010-8545(02)00027-9.
- [4] R. Rojas, A.F. Jimenez-Kairuz, R.H. Manzo, C.E. Giacomelli, Release kinetics from LDH-drug hybrids: Effect of layers stacking and drug solubility and polarity, *Colloids Surfaces A Physicochem. Eng. Asp.* 463 (2014) 37–43. doi:10.1016/j.colsurfa.2014.09.031.
